# Supplementary material for: Systemic therapies for metastatic hormone‐sensitive prostate cancer: network meta‐analysis
Source: PubMed Central journal article supplement — BJU Int. 2021 Jul 21;129(4):423–33. doi: 10.1111/bju.15507 (PMC9291853; doi:10.1111/bju.15507), 2021-07-21

Supplementary Figure 3

Forest plots (adverse events profile)

A. Neutropenia (any grade)

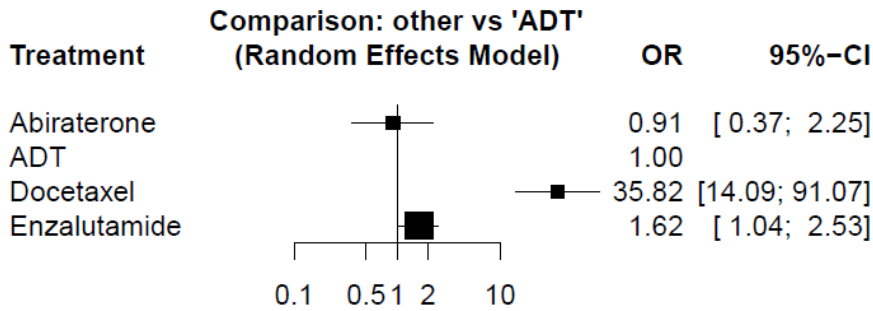

B. Anemia (any grade)

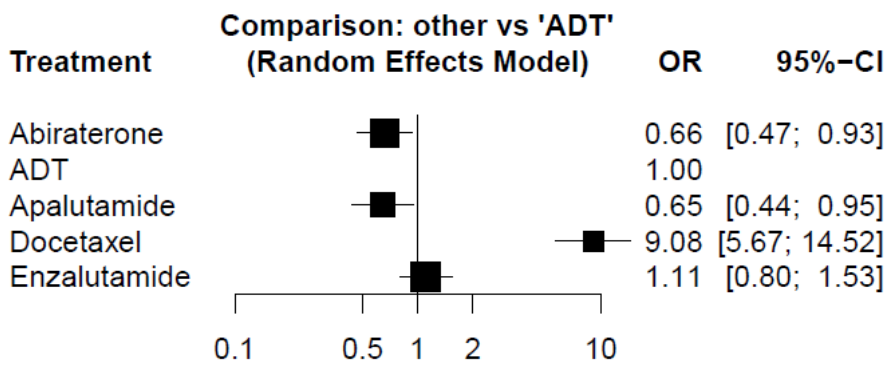

C. Thrombocytopenia (any grade)

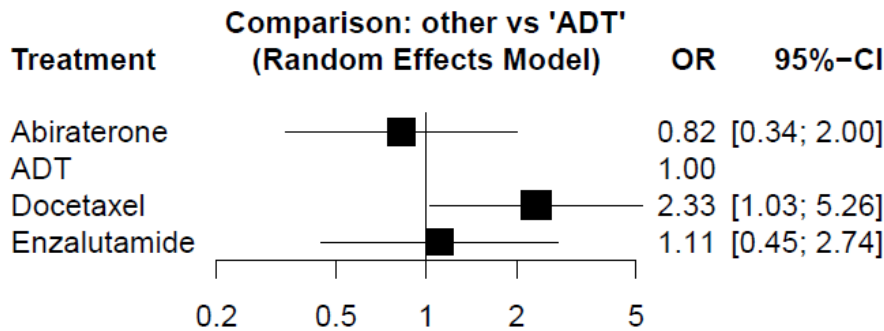

D. Elevated AST (any grade)

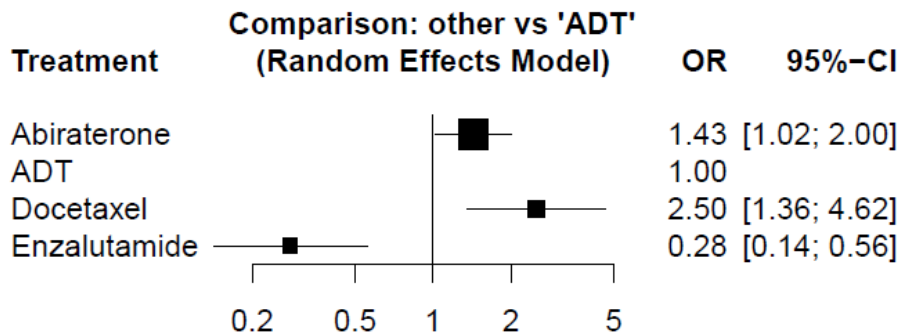

E. Elevated AST (grade  $\geq 3$ )

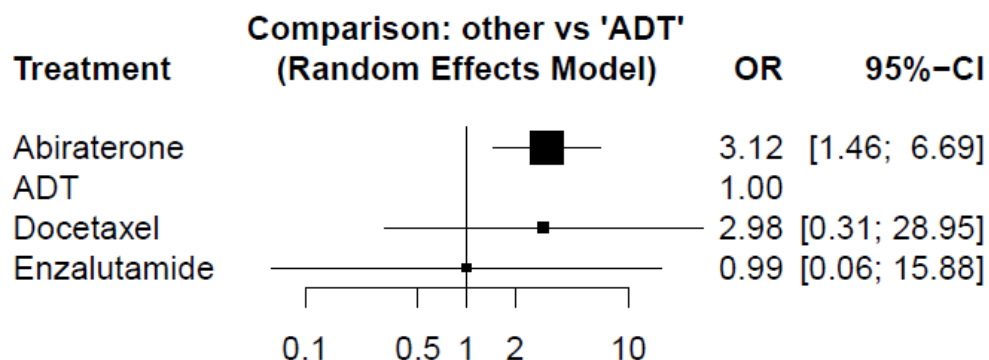

F. Elevated ALT (any grade)

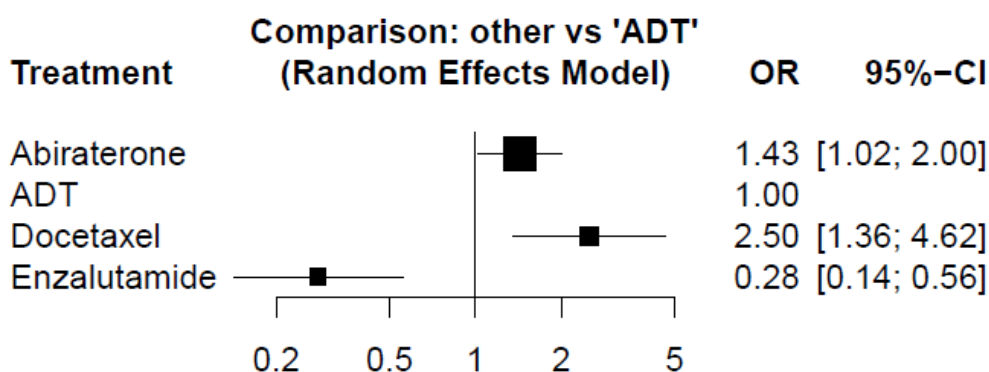

G. Elevated ALT (grade  $\geq 3$ )

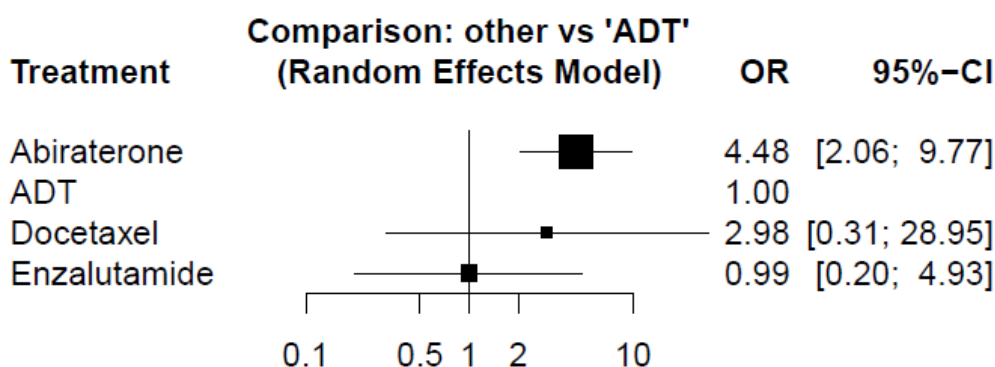

H. Cardiovascular disease (any grade)

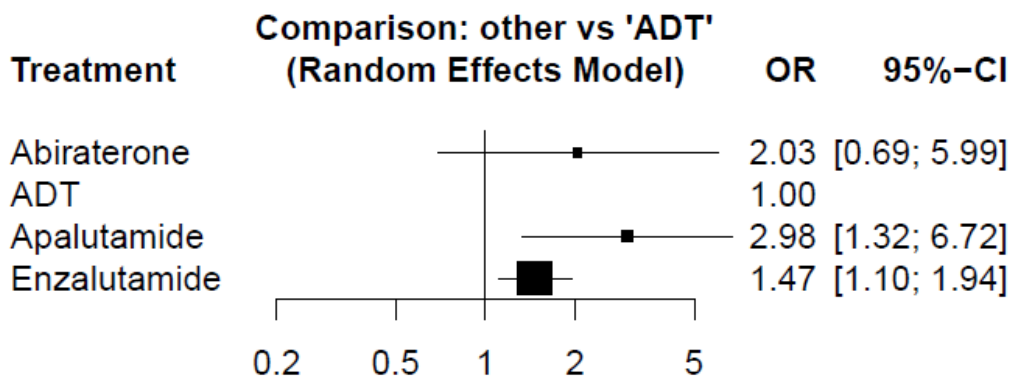

I. Dizziness (any grade)

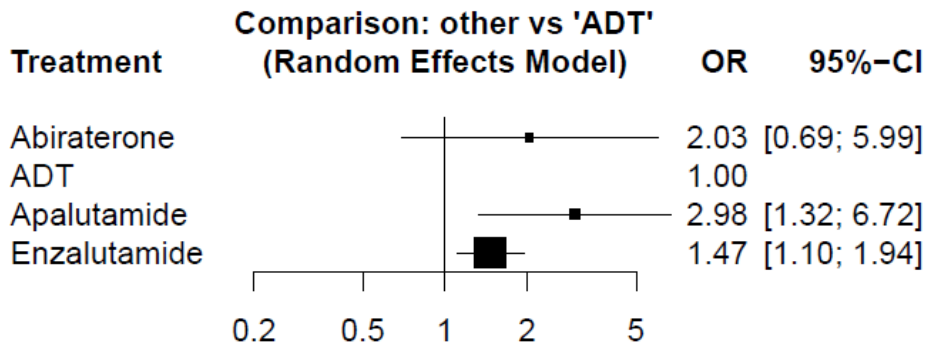

J. Fall (any grade)

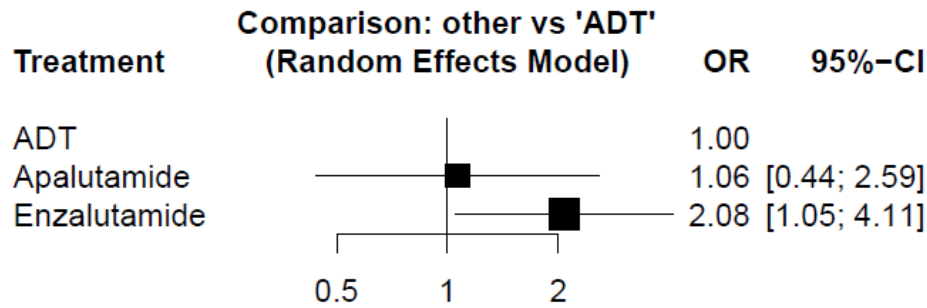

K. Fatigue (any grade)

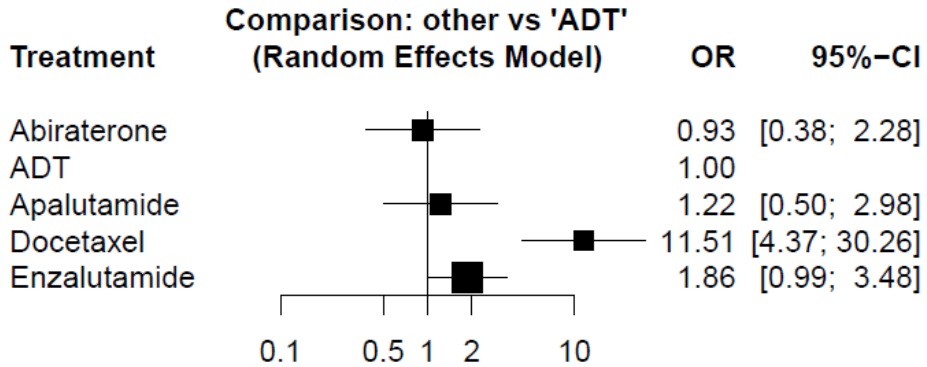

L. Fatigue (grade ≥ 3)

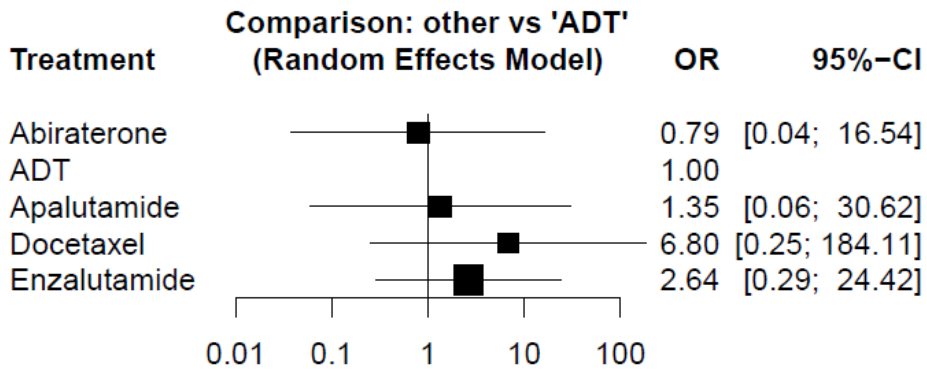

M. Hypertension (any grade)

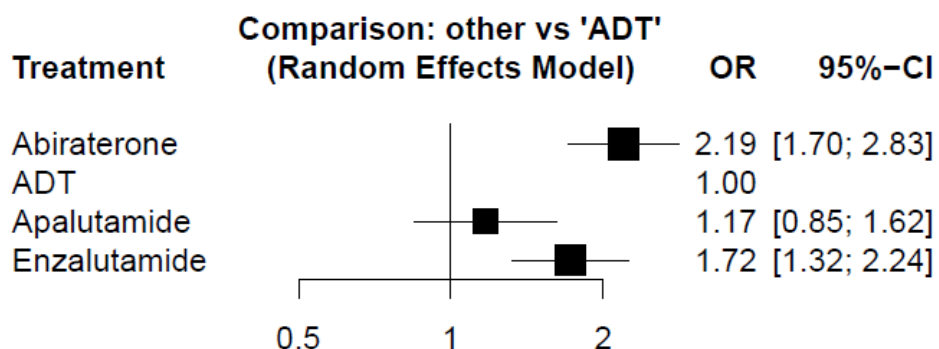

N. Hypertension (grade  $\geq 3$ )

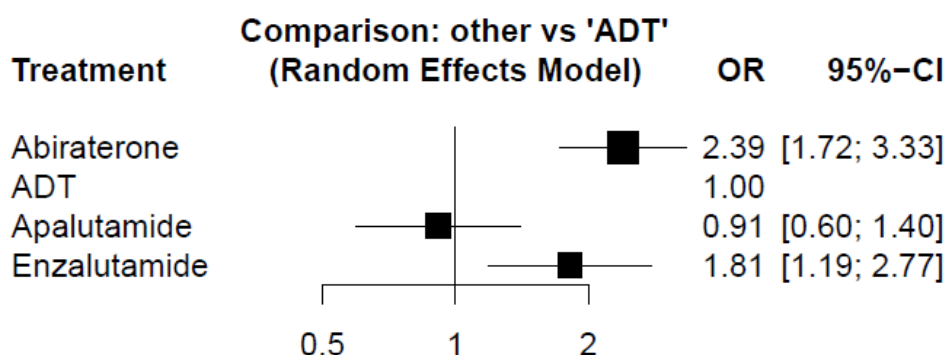

O. Neuropathy (any grade)

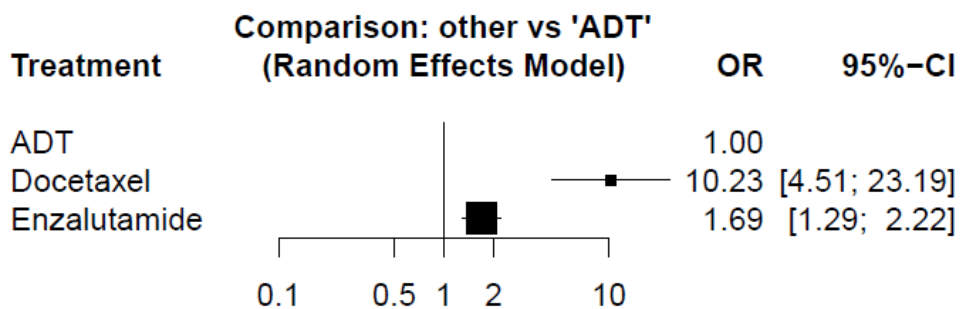

P. Rash (any grade)

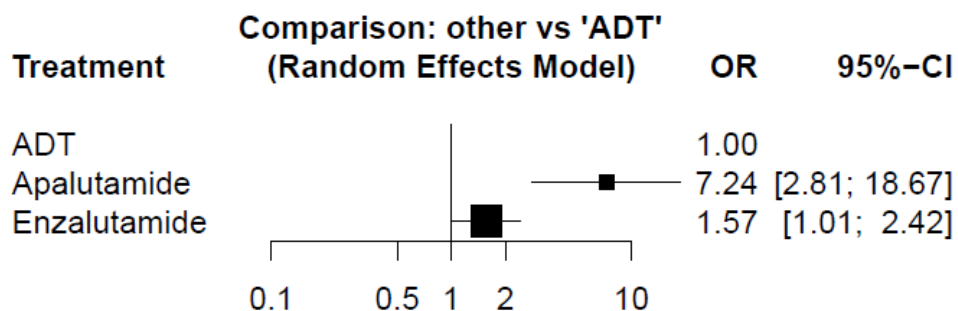

Supplement: BJU-129-423-s007.pdf [file BJU-129-423-s007.pdf]
