# Supplementary material for: Systemic therapies for metastatic hormone‐sensitive prostate cancer: network meta‐analysis
Source: PubMed Central journal article supplement — BJU Int. 2021 Jul 21;129(4):423–33. doi: 10.1111/bju.15507 (PMC9291853; doi:10.1111/bju.15507), 2021-07-21

Supplementary Figure 2

Network plots showing the association of systemic therapy in metastatic hormone-sensitive prostate cancer

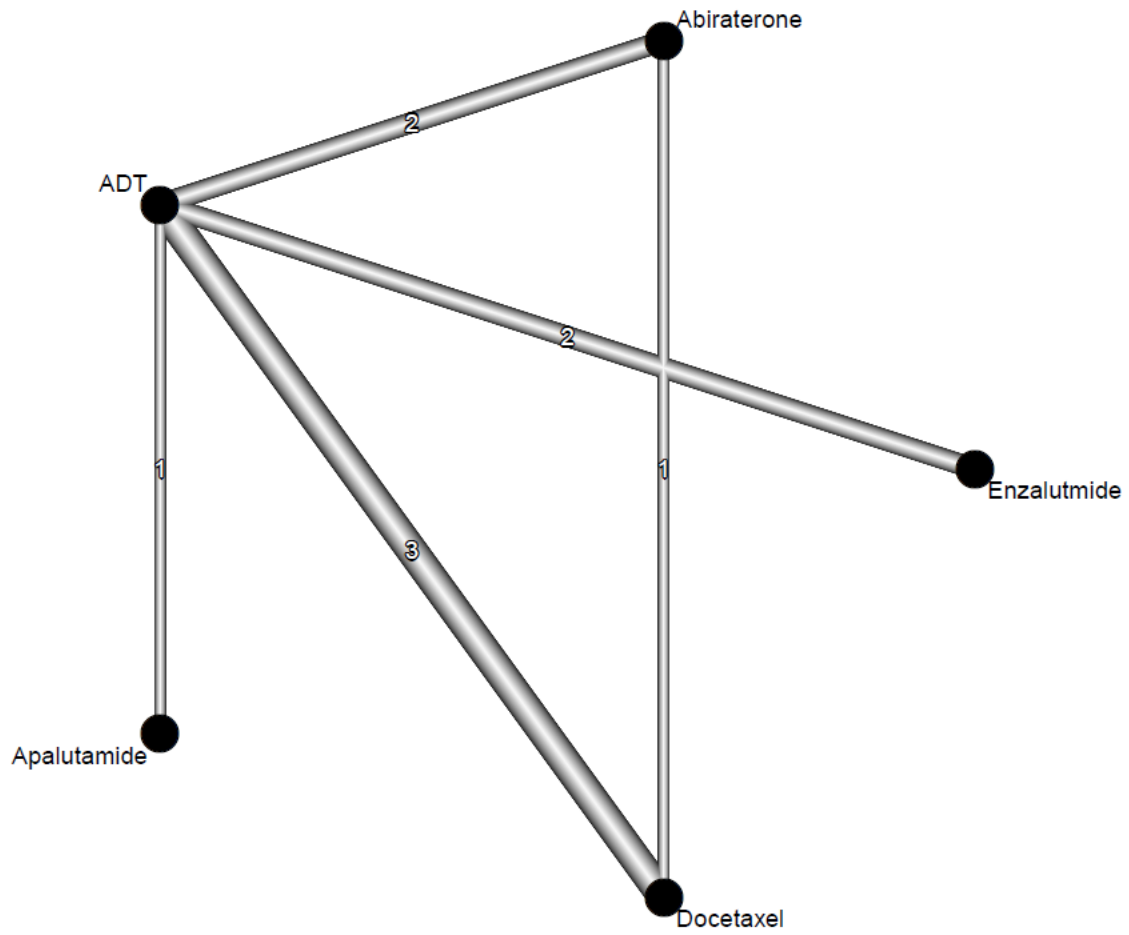

Supplement: BJU-129-423-s002.pdf [file BJU-129-423-s002.pdf]
