# Supplementary material for: Systemic therapies for metastatic hormone‐sensitive prostate cancer: network meta‐analysis
Source: PubMed Central journal article supplement — BJU Int. 2021 Jul 21;129(4):423–33. doi: 10.1111/bju.15507 (PMC9291853; doi:10.1111/bju.15507), 2021-07-21
Supplement: BJU-129-423-s003.pdf [file BJU-129-423-s003.pdf]

## Supplementary Figure 1

Risk of bias summary of the included studies for network meta-analysis

(A) Random sequence generation (selection bias); (B) allocation concealment (selection bias); (C) blinding of participants and personal (performance bias); (D) blinding of outcome assessment (detection bias); (E) incomplete outcome data (attrition bias); (F) selective reporting (reporting bias); (G) other bias. Green circles represent a low risk of bias and confounding, red circles represent a high risk of bias and confounding, and yellow circles represent an unclear risk of bias and confounding.

| <i>Author, year</i>           | <i>A</i> | <i>B</i> | <i>C</i> | <i>D</i> | <i>E</i> | <i>F</i> | <i>G</i> |
|-------------------------------|----------|----------|----------|----------|----------|----------|----------|
| <i>ARCHES</i>                 | ●        | ●        | ●        | ●        | ●        | ●        | ●        |
| <i>CHARTEd</i>                | ●        | ●        | ●        | ●        | ●        | ●        | ●        |
| <i>ENZAMET</i>                | ●        | ●        | ●        | ●        | ●        | ●        | ●        |
| <i>GETAG-AFU15</i>            | ●        | ●        | ●        | ●        | ●        | ●        | ●        |
| <i>LATITUDE</i>               | ●        | ●        | ●        | ●        | ●        | ●        | ●        |
| <i>STAMPEDE (Arm C, G)</i>    | ●        | ●        | ●        | ●        | ●        | ●        | ●        |
| <i>STAMPEDE (Arm G)</i>       | ●        | ●        | ●        | ●        | ●        | ●        | ●        |
| <i>STAMPEDE (Arm B, C, E)</i> | ●        | ●        | ●        | ●        | ●        | ●        | ●        |
| <i>TITAN</i>                  | ●        | ●        | ●        | ●        | ●        | ●        | ●        |
