# Supplementary material for: Systemic therapies for metastatic hormone‐sensitive prostate cancer: network meta‐analysis
Source: PubMed Central journal article supplement — BJU Int. 2021 Jul 21;129(4):423–33. doi: 10.1111/bju.15507 (PMC9291853; doi:10.1111/bju.15507), 2021-07-21

Supplementary Figure 5

Forest plots (low volume disease)

A. Overall survival

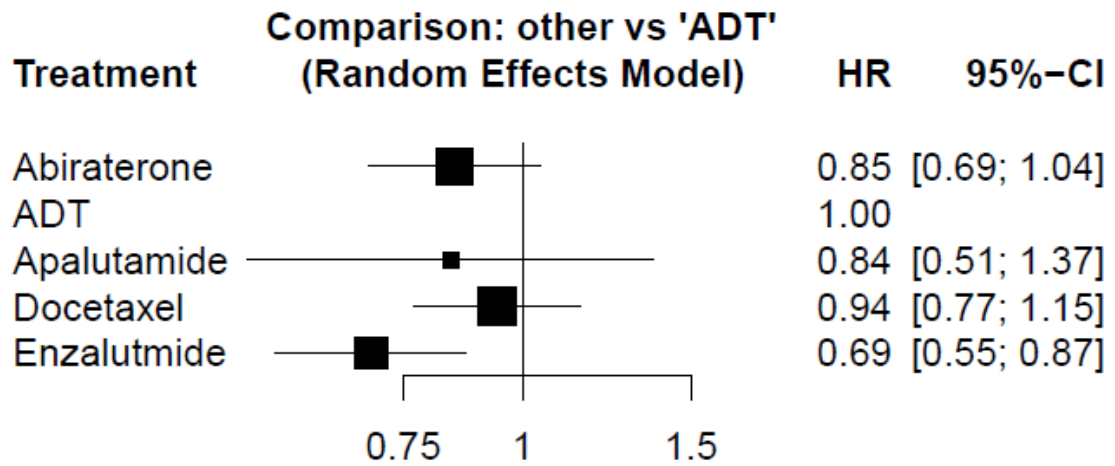

B. Progression free survival

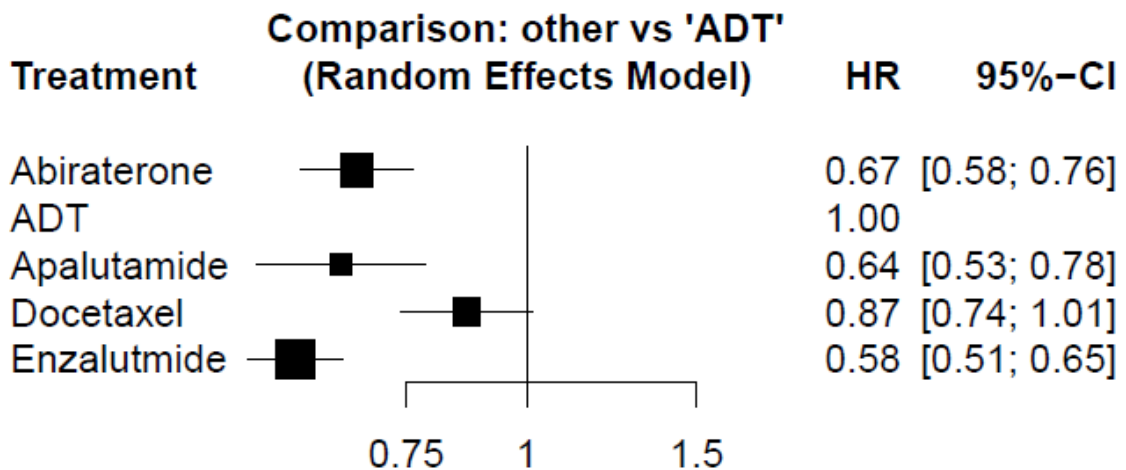

C. Progression free survival

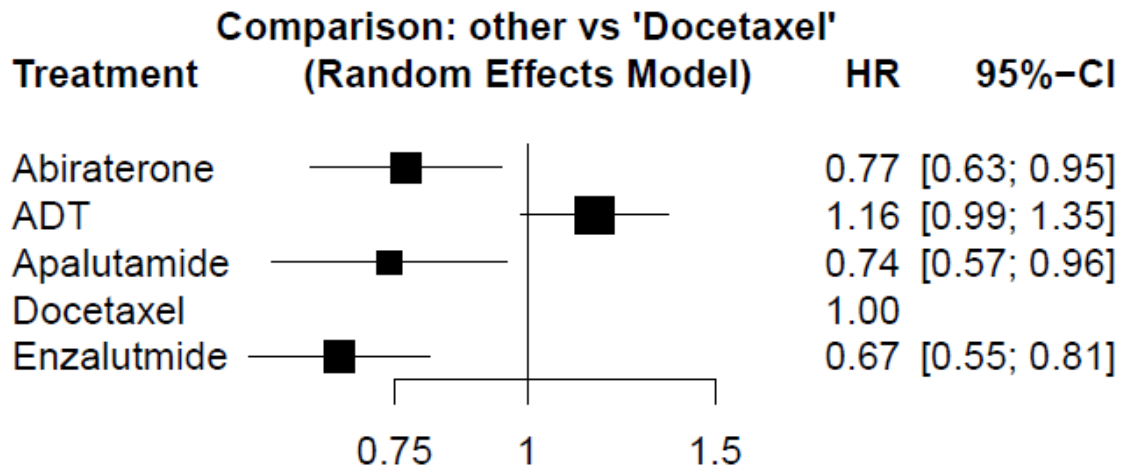

Supplement: BJU-129-423-s008.pdf [file BJU-129-423-s008.pdf]
